# Supplementary material for: Global Utilization Trends of Direct Acting Antivirals (DAAs) during the COVID-19 Pandemic: A Time Series Analysis
Source: MDPI journal article supplement (doi:10.3390/v13071314), 2021-07-07
Supplement: s1 [file s1]

**Table S1.** List of Direct Acting Antivirals.

| Direct Acting Antiviral (DAA) Drug List           |                                            |
|---------------------------------------------------|--------------------------------------------|
| Name                                              | Anatomical Therapeutic Chemical (ATC) Code |
| Boceprevir                                        | J05AP03                                    |
| daclatasvir                                       | J05AP07                                    |
| Dasabuvir                                         | J05AP09                                    |
| Dasabuvir, Ombitasvir, Paritaprevir and Ritonavir | J05AP52                                    |
| Elbasvir                                          | J05AP10                                    |
| Elbasvir and Grazoprevir                          | J05AP54                                    |
| Glecaprevir and Pibrentasvir                      | J05AP57                                    |
| Grazoprevir                                       | J05AP11                                    |
| Ombitasvir, Paritaprevir and Ritonavir            | J05AP53                                    |
| Ribavirin                                         | J05AP01                                    |
| Simeprevir                                        | J05AP05                                    |
| Sofosbuvir                                        | J05AP08                                    |
| Sofosbuvir and Ledipasvir                         | J05AP51                                    |
| Sofosbuvir and Velpatasvir                        | J05AP55                                    |
| Sofosbuvir, Velpatasvir and Voxilaprevir          | J05AP56                                    |
| Telaprevir                                        | J05AP02                                    |

**Table S2.** Proportion of total pharmacy sales obtained by IQVIA-MIDAS database, stratified by country.

| Country            | Market Covered by MIDAS (%) |
|--------------------|-----------------------------|
| Argentina          | 73                          |
| Australia          | 97                          |
| Austria            | 100                         |
| Belarus            | 100                         |
| Belgium            | 99                          |
| Bosnia             | 95                          |
| Brazil             | 97                          |
| Bulgaria           | 98                          |
| Canada             | 100                         |
| Central America    | Missing                     |
| Chile              | 71                          |
| China              | 72                          |
| Czech Republic     | 95                          |
| Denmark            | 100                         |
| Egypt              | 75                          |
| Estonia            | 88                          |
| Finland            | 100                         |
| France             | 100                         |
| French West Africa | 86                          |

---

|                            |         |
|----------------------------|---------|
| Germany                    | 100     |
| Hungary                    | 100     |
| India                      | 95      |
| Ireland                    | 100     |
| Italy                      | 100     |
| Japan                      | 100     |
| Kazakhstan                 | 100     |
| Korea                      | 99      |
| Latvia                     | 100     |
| Lithuania                  | 99      |
| Mexico                     | 100     |
| Morocco                    | 88      |
| Netherlands                | Missing |
| New Zealand                | 97      |
| Norway                     | 100     |
| Pakistan                   | 85      |
| Poland                     | 100     |
| Portugal                   | 100     |
| Puerto Rico                | Missing |
| Romania                    | 100     |
| Russian Federation         | 98      |
| Serbia                     | 93      |
| Slovakia                   | 97      |
| Slovenia                   | 98      |
| South Africa               | 100     |
| Spain                      | 99      |
| Sweden                     | 100     |
| Switzerland                | 100     |
| Taiwan                     | 97      |
| Thailand                   | 93      |
| Turkey                     | 100     |
| United Arab Emirates (UAE) | 45      |
| United Kingdom (UK)        | 89      |

---
